# Supplementary material
Source: PubMed Central journal article supplement (PMC3779709)

## SUPPLEMENTARY FIGURES

**FIGURE S1. The peptide sequence coverage for identified amyloid-forming proteins.** Regions of the protein sequence that match identified peptides by tandem mass spectrometry are highlighted in gray. **A, B**, the peptide sequence coverages for *S. cerevisiae* Sup35 and Rnq1 prion proteins in a representative tryptically-digested protein sample prepared from strain 74D-694 [PSI+][RNQ+]. P.D. indicates their respective low-complexity prion domains. For the Rnq1 sequence, all possible tryptic cleavage sites are marked with arrows. **C**, the sequence coverage of HttQ74-GFP recovered from PC12 cells. **D**, sequence coverage of ubiquitin (recovered together with HttQ74-GFP from PC12 cells).

**FIGURE S2. Mass Spectra for peptides of *S. cerevisiae* Sup35 and Rnq1 prion proteins in representative tryptically-digested protein samples prepared from strain 74D-694 [PSI+][RNQ+].** MS<sup>E</sup> has been applied after 1D reverse phase (RP) liquid chromatography (LC) of the peptide mixture. **A**, MS spectrum of the precursor ions that matched to the identified Sup35 prion protein. RT - retention time for each precursor during RPLC; relative peptide

intensity is shown on the vertical (ordinate) axis. Standard peptides that matched Sup35 are shown in blue; peptides containing a miscleavage site are shown in red. Grey and magenta codify peptides of other proteins in the sample. **B**, MS-MS spectrum assigned to the peptide sequence of Sup35 (R)HINAPFMLPIAAK(M) with MH+(Da) 1422.7946. **C**, MS spectrum of the precursor ions that matched to the identified Rnq1 prion protein are shown in blue. Grey and magenta codify peptides of other proteins in the sample. **D**, MS-MS assigned to the peptide sequence of Rnq1 (K)LISEAESHFSQGNHAEAVAK(L) with MH+(Da) 2125.0317.

**FIGURE S3. Gene ontology analysis of the identified proteins.** A histogram indicating the biological processes that are assigned to the 15 yeast proteins identified in the SDS-resistant fractions in comparison with the whole yeast proteome. The analysis has been done utilizing the Panther database and tools (<http://www.pantherdb.org>). The analyzed group is significantly enriched in proteins involved in cell communication, cell cycle, system process, developmental process and homeostatic process (indicated by \*)

Figure S1

A. Sup35

|     |             |            |            |            |            |        |
|-----|-------------|------------|------------|------------|------------|--------|
| 1   | MSDSNQGNQ   | QNYQOYSQNG | NQQQGNRYQ  | CYQAYNAQAQ | PAGGYQNYQ  | } P.D. |
| 51  | GYSGYQQGGY  | QQYNPDAGYQ | QQYNPQQGYQ | QYNPQQGYQQ | QFNPDGGRGN |        |
| 101 | YKRFYNNNL   | QGYQAGFQFQ | SGMSLMDFQ  | RQKQAAAPK  | KTKLIVSSS  |        |
| 151 | SIHLANATKK  | VGTPAESDK  | KEEKSAAETK | EPDGFQCK   | ESVQKEEKPV |        |
| 201 | QTEENTEEKS  | ELPKVEDLKI | SESTHNTNNA | NVTSADALIK | EQEEVDDEV  |        |
| 251 | VNDHFGGKDH  | VSLIFMCHVD | AGKSTMGGHL | LYLTGSVDKR | TIEKYEREAK |        |
| 301 | DAGRQGWYLS  | VYMDTMKEER | MDGKTIEVGK | AYFETEARRV | TILDAPGHRM |        |
| 351 | YVSENIIGGAS | QADVGVLVIS | ARKGEYETGP | ERGGQTRFHA | LLAHTQGVNK |        |
| 401 | NVVVVNKKDD  | PTVMSKERY  | DQCVMVSNF  | LRAICYNIKT | DVVFMFVSGY |        |
| 451 | SGANLKHVD   | PKECPMYTGP | TLELYLDTMN | HVDRHINAPF | MLPIAAKKK  |        |
| 501 | LGLIYEGEIE  | SGHIKQGGT  | ALMDDTAVE  | IQNIYNETEN | EVDMAACGEQ |        |
| 551 | VKLRKGVVEI  | EDISPGFVLT | SPRNPIKSVT | KFVAQIAIVE | LKSIIAAGFS |        |
| 601 | CVMHVTAIE   | EVHIVKLLHR | LEKGTNRKSR | KPPAFARCKM | KVIAVLETEA |        |
| 651 | PVCVETYQDY  | PQLGRFTLRD | QGITLAIKRI | VKIAE      |            |        |

B. Rnq1

|     |            |            |            |            |            |        |
|-----|------------|------------|------------|------------|------------|--------|
| 1   | MDTKLISEA  | ESHFSQGMHA | EAVAKLTSAA | QSNPNDQMS  | TIESLIQKIA | } P.D. |
| 51  | GVVNDNRSGG | SDASQDFAG  | GGSSFMTLM  | ADSKSSQTO  | LGLALLATV  |        |
| 101 | NTHSSMKGSS | NRGFDVGTVM | SMLSGSGGGS | QSMGASGLAA | LASQFFKSGM |        |
| 151 | NSQGGQGGG  | QGGQGGQGG  | QGSFTALASL | ASSFMNSNN  | NQQGNQSSG  |        |
| 201 | GSSFGALASH | ASSFMNSNN  | QNSNSQQGY  | NQSYQGNQN  | SQGYNNQYQ  |        |
| 251 | GGNGGYQQQ  | QSGGAFSSL  | ASMAQSYLGG | QGTQSNQQY  | NQQGNQQQ   |        |
| 301 | YQQQGNQYQH | QQQGQQQQG  | HSSFSALAS  | MASVYLGNS  | NSNSYGGQQ  |        |
| 351 | QAMEYGRPQQ | NGQQQSMEYG | RPQYGGQNS  | NGQHSFNFS  | GMSQQNNNG  |        |
| 401 | NQNMV      |            |            |            |            |        |

C. HttQ74-GFP

|     |            |            |            |            |            |          |
|-----|------------|------------|------------|------------|------------|----------|
| 1   | MKAFESLKSF | QQQQQQQQQ  | QQQQQQQQQ  | QQQQQQQQQ  | QQQQQQQQQ  | } poly Q |
| 51  | QQQQQQQQQ  | QQQQQQQQQ  | QQQQQQQQQ  | QQQQPPPPP  | PPPPPQLPQP |          |
| 101 | PPQAQPLLQ  | PQPPPPPPP  | PPGPGVSKGE | ELFTGVVPII | VELDGDVNGH |          |
| 151 | KFSVSGEGEG | DATYCKLTLK | FICTGKLPV  | PWPTLVTTLT | YGVQCFSRYP |          |
| 201 | DHMKQHDFFK | SAMPEGYVQE | RTIFFKDDGN | YKTRAEVKEE | GDTLVNRIEL |          |
| 251 | KGIDFKEDGN | LLGHKLEYNY | NSHNVYIMAD | KQKNGIKVNF | KIRHNIEDGS |          |
| 301 | VQLADHYQQN | TFIGDGPVLL | EDNHYLSTQS | ALSKDPNEKR | DHMVLEFVT  |          |
| 351 | AAGITLGMDE | LYK        |            |            |            |          |

D. Polyubiquitin recovered with HttQ74-GFP

|    |             |            |            |           |            |
|----|-------------|------------|------------|-----------|------------|
| 1  | MQIFVKTLTG  | KTITLEVEPS | DTIENVKAKI | QDKEGIPDQ | QRLIFAGKQL |
| 51 | EDGRFTLSDYN | IQKESTLHLV | LRLRGGQIF  | VKTLTGKTI | LEVEPSDTIE |

Figure S2

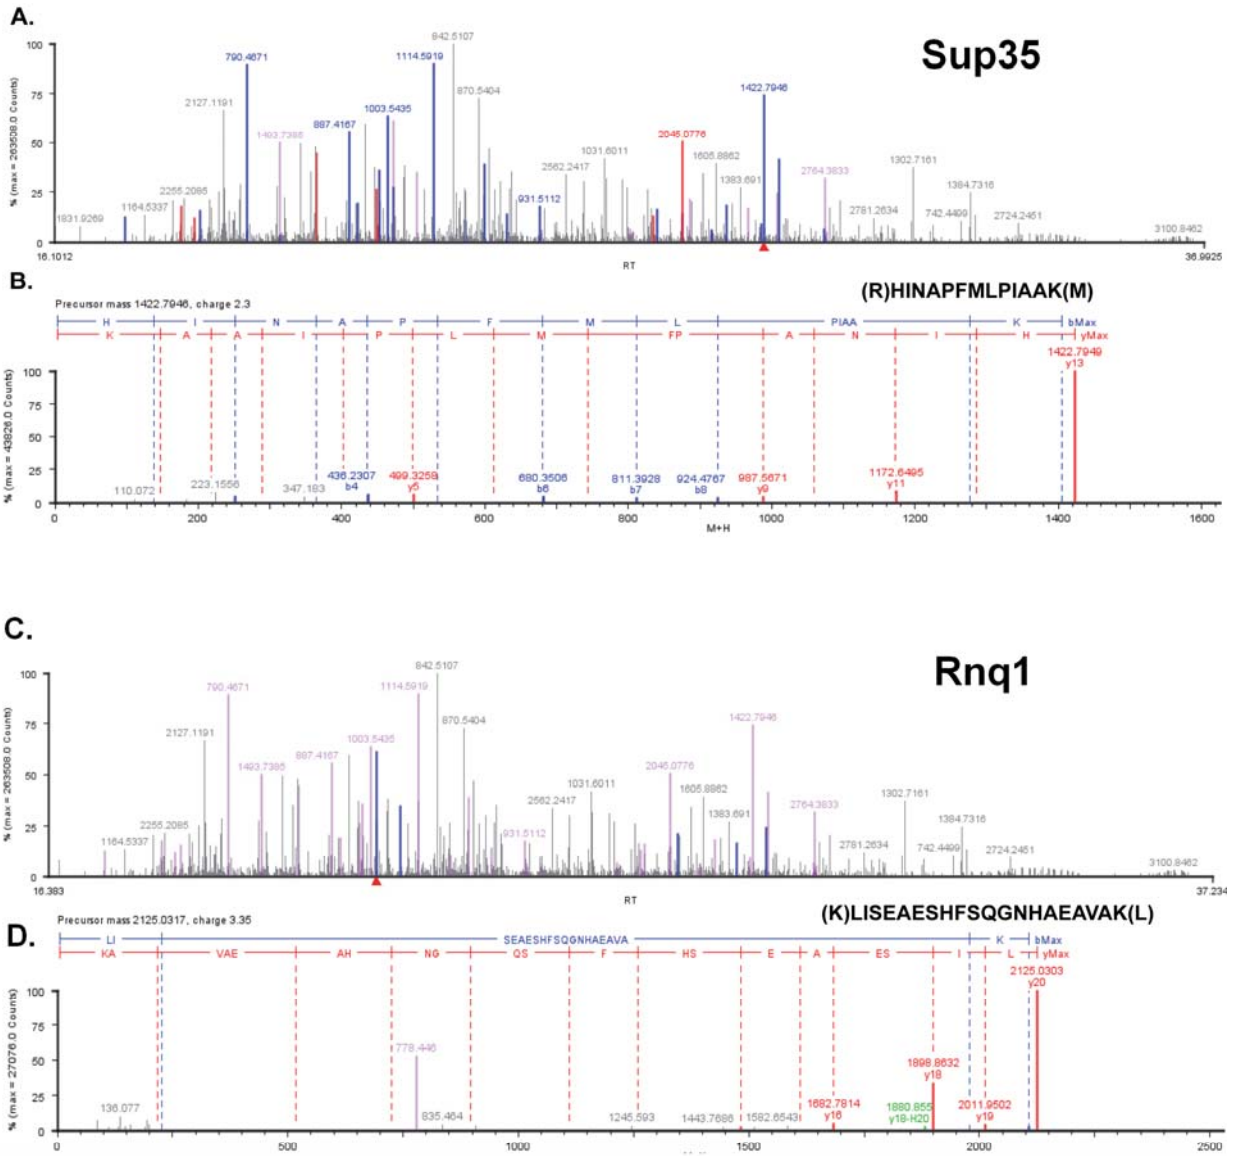

Figure S3

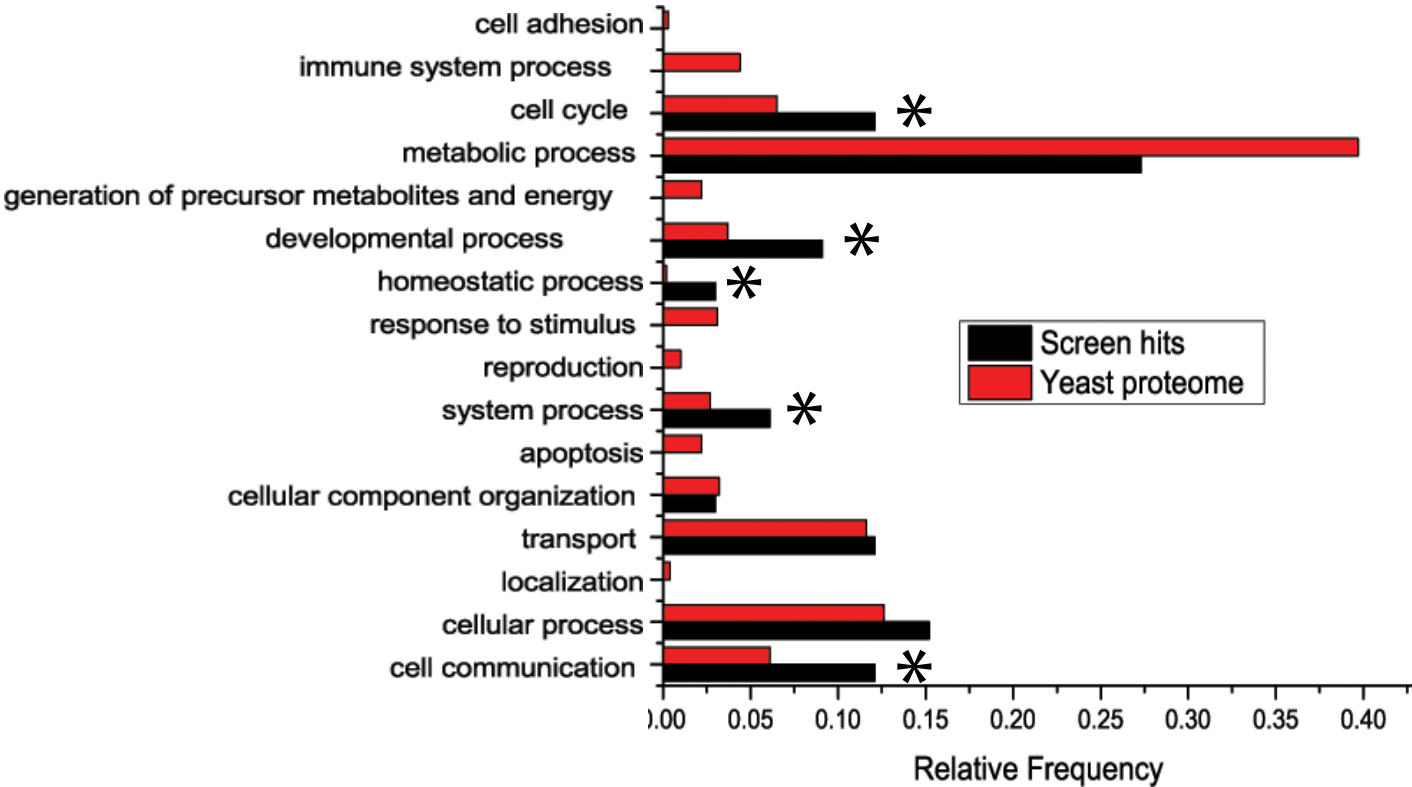

Supplement: supp_M113.485359_jbc.M113.485359-1.pdf [file supp_M113.485359_jbc.M113.485359-1.pdf]
